# Supplementary material for: Effect of Wholegrain Flour Particle Size in Bread on Glycaemic and Insulinaemic Response among People with Risk Factors for Type 2 Diabetes: A Randomised Crossover Trial
Source: MDPI journal article supplement (doi:10.3390/nu13082579), 2021-07-27
Supplement: s1 [file s1]

**Supplementary Table S2:** Flour particle size distribution of one wholegrain roller-milled wheat flour and four wholegrain wheat stoneground flours

| Sieve size          | Roller-milled flour <sup>b</sup> | Stoneground Flour A <sup>b</sup> | Stoneground Flour B <sup>b</sup> | Stoneground Flour C <sup>c</sup> | Stoneground Flour D <sup>c</sup> |
|---------------------|----------------------------------|----------------------------------|----------------------------------|----------------------------------|----------------------------------|
| % >1.4 mm           | 0.8                              | 0.2                              | 0.2                              | 0                                | 0.9                              |
| % 1 – 1.4 mm        | 2                                | 3.6                              | 1.9 <sup>a</sup>                 | 0.8                              | 9.4                              |
| % 710 µm – 999 µm   | 3.5                              | 13                               |                                  | 6.8                              | 17.7                             |
| % 500 – 709 µm      | 5.5                              | 19                               | 5.2                              | 15.8                             | 15.6                             |
| % 355 – 499 µm      | 3.7                              | 16.7                             | 4.3                              | 17.4                             | 10.1                             |
| % 250 – 354 µm      | 1                                | 13.8                             | 3.7                              | 15.8                             | 7.8                              |
| % 180 – 249 µm      | 1.1                              | 8.7                              | 7.4                              | 9.3                              | 5.2                              |
| % 125 – 179 µm      | 9.6                              | 6.8                              | 19.8                             | 8.2                              | 5                                |
| % 90 – 124 µm       | 22                               | 4.5                              | 28                               | 6                                | 4.7                              |
| % 63 – 89 µm        | 21.8                             | 4.7                              | 11.4                             | 5.6                              | 6                                |
| % <63 µm            | 25.9                             | 7.6                              | 13.8                             | 11.9                             | 15.4                             |
| % Lost <sup>d</sup> | 2.9                              | 1.4                              | 4.4                              | 2.5                              | 1.9                              |
| % over 710 µm       | 6.45                             | 16.7                             | 2.2                              | 31.7                             | 28.1                             |
| % below 180 µm      | 79.3                             | 23.7                             | 73                               | 23.4                             | 31.1                             |

<sup>a</sup> The 1 mm sieve was not included in the sieve stack for this flour; so the category is 710 – 1399 µm.

<sup>b</sup> Used to make breads for glycaemic and insulinaemic testing in the present study

<sup>c</sup> Not included in glycaemic and insulinaemic testing in the present study

<sup>d</sup> The sieve stack was not airtight and it is likely that the 'lost' portion was comprised of fine particles.
