# Supplementary material for: Effect of Wholegrain Flour Particle Size in Bread on Glycaemic and Insulinaemic Response among People with Risk Factors for Type 2 Diabetes: A Randomised Crossover Trial
Source: MDPI journal article supplement (doi:10.3390/nu13082579), 2021-07-27
Supplement: s1 [file s1]

**Supplementary Table S1:** Ingredients of breads made from fine roller-milled flour, fine stoneground flour, and coarse stoneground flour

| <b>Ingredient</b>                         | <b>% of total</b> | <b>Quantity per batch<sup>a</sup></b> |
|-------------------------------------------|-------------------|---------------------------------------|
| <b>Wholegrain wheat flour<sup>b</sup></b> | 55%               | 3223.8                                |
| <b>Water</b>                              | 39%               | 2321.4                                |
| <b>Salt</b>                               | 1%                | 48.6                                  |
| <b>Improver &amp; Softener</b>            | <1%               | 32.4                                  |
| <b>Gluten</b>                             | 3%                | 193.2                                 |
| <b>Calcium acetate</b>                    | <1%               | 19.2                                  |
| <b>Vegetable oil</b>                      | <1%               | 32.4                                  |
| <b>Yeast</b>                              | <1%               | 18.0                                  |

<sup>a</sup> Each batch produced six loaves.

<sup>b</sup> Fine roller-milled flour, fine stoneground flour, and coarse stoneground flours were used for each of the three breads.
