# Supplementary material for: Effect of Wholegrain Flour Particle Size in Bread on Glycaemic and Insulinaemic Response among People with Risk Factors for Type 2 Diabetes: A Randomised Crossover Trial
Source: MDPI journal article supplement (doi:10.3390/nu13082579), 2021-07-27
Supplement: s1 [file s1]

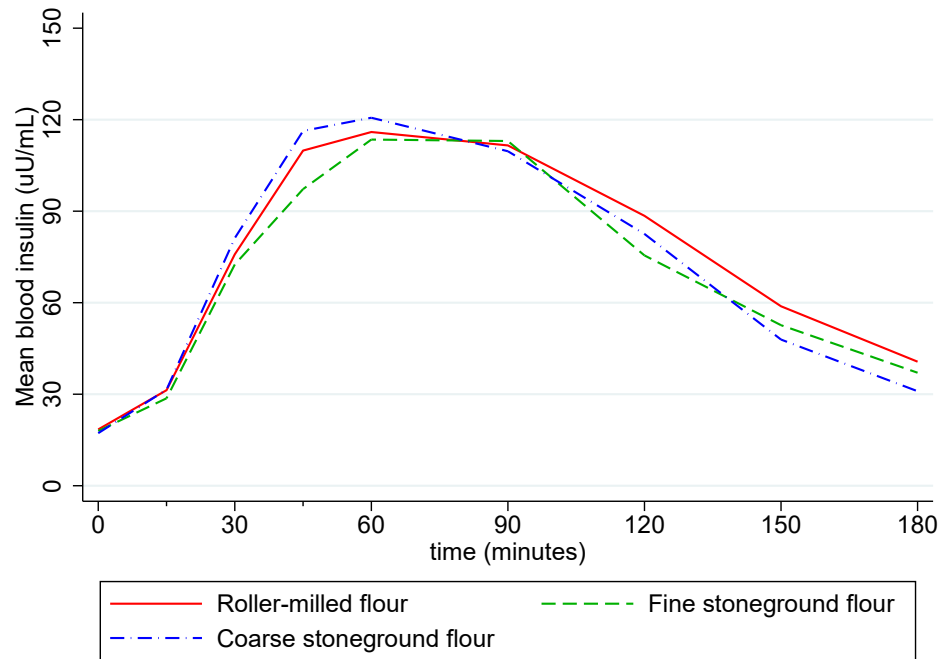

**Supplementary Figure S2:** Mean postprandial insulin responses to wholegrain breads of different milling method and grain particle size among participants with known risk factors for type 2 diabetes (n=23).

This figure is intended to illustrate postprandial insulinaemic response patterns; error bars are not included to avoid inappropriate inference given this is a crossover trial.
